# Supplementary material for: The Impact of Pranic Healing and Mindfulness on Respiratory Function, Physical Endurance, and Wellbeing: Randomized Double-Blind Study among Paramedical Students
Source: Research Square preprint supplement (doi:10.21203/rs.3.rs-7083904/v1), 2025-08-12
Supplement: Supplementary file 2 [file b6407de3010f87fe0c8e0526.docx]

Thematic Analysis Table -3a).

**Core Category-1: Energy Experiences**

The Energy Experiences category revealed pranic energy sensations (category:-1), ranging from Physical Sensations of Energy (*tingling, body was shaking a lot, Sometimes felt electricity movement in the body, priking etc*) and magnetic sensations (*feeling magnetic, attraction between hands*), *something moving inside the body*) Temperature awareness *(The body was heated", "hands and feet became hot during the sitting, cooling)* and awareness of the presence of energy (*Some energy, "something moving inside my body and hands and legs, somewhat experience between the hands)* . These experiences underscore the subjective nature of energy perceptions.

**Benefits as comprehensive Well-being and barriers associated with MPH and SPH**

After the 8th day intervention, following questions were asked. what were the benefits that you encountered while participating in the study program? what were the barriers that you encountered while participating in the intervention? Responses were categorised under the

**Core Category -2: Comprehensive Well-being**

This core category integrates both mental and physical benefits, recognizing participants who experienced improvements in either or both aspects. It highlights the holistic impact of the intervention on overall well-being, reflecting the interconnectedness of mind and body.

**Sub Category-1: Mental benefits**

Category of mental benefits participants reported experiencing during the intervention, highlighting positive changes in mental, emotional, and cognitive states. The responses were organized under four subthemes: Peace and Calmness, Improved Mental Clarity & Concentration, Relaxation, and Emotional Well-being.

**Sub Category-2: Physical benefits**

This category captures the physical benefits participants reported experiencing during the intervention, the responses are grouped into three subthemes: Improved Sleep, Enhanced Breathing, and General Well-being. These themes underscore the physical improvements participants noted, reflecting the holistic impact of the intervention on their health and overall physical state.

**Sub Category-3: Barriers**

This category explores the Barriers participants encountered during the intervention, focusing on challenges or discomforts that may have impacted their experience. The responses are grouped into two subthemes: Presence of Barriers and Absence of Barriers. These themes highlight both the difficulties participants faced and instances where no significant barriers were reported.

PSE: Physical sensation of Energy, MSE: Magnetic Sensation of Energy

TA: Temperature Awareness, APE: Awareness of Presence of Energy

Supplementary Figure -2: Pranic Energy Experiences reported during the fourth and final sessions of MPH participants

In the MPH group, 11 participants reported energy experiences after the fourth session, compared to only one in the sham group. By the final session, 37 participants in the MPH group reported experiencing PES. The frequency of various energy-related sensations increased from the fourth session to the last session, including Physical Sensation of Energy (0.20%-90%), Magnetic Sensation of Energy (7%-15%), Temperature Awareness (0-45%), and Awareness of the Presence of Energy (2%-7%) (Supplementary Figure -4,). Among those reporting Physical Sensation of Energy, 21(52.5%) participants experienced tingling sensations, while 20(50%) reported temperature awareness (19-heat/warm, 1- experienced cold) (Supplementary Figure -2).
